# Supplementary material for: Expression of Concern on “Influence of gastrectomy on cortical and cancellous bones in rats”
Source: Gastroenterol Res Pract. 2019 Jul 7;2019:4312310. doi: 10.1155/2019/4312310 (PMC6642759; doi:10.1155/2019/4312310)
Supplement: Supplementary Materials — The files include the data of the two studies. [file 4312310.f1.zip]

Archive with 2 entries (2 files):
- Gastrectomy and Vitamin K study.zip
- Gastrectomy study.zip
